# Supplementary material for: In situ FTIR spectroscopic study of the CO2methanation mechanism on Ni/Ce0.5Zr0.5O2
Source: Royal Society of Chemistry journal article supplement (doi:10.1039/c3cy00868a), 2013-11-20
Supplement: c3cy00868a.pdf [file c3cy00868a.pdf]

Supplementary data

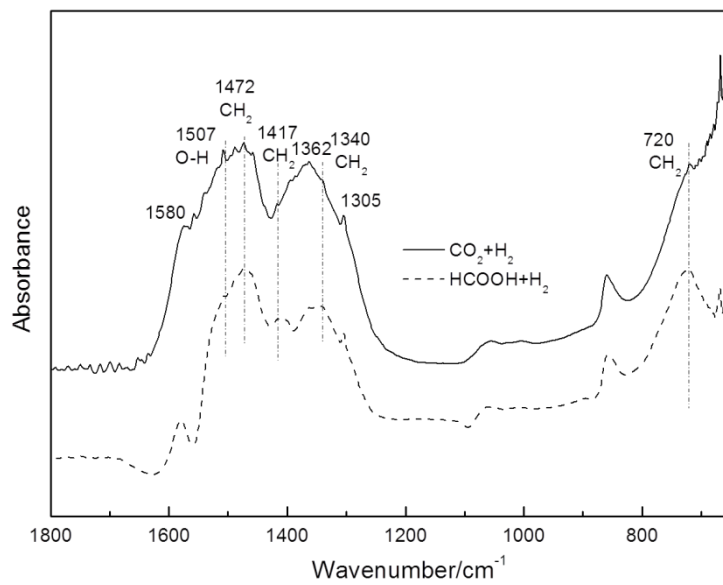

Figure s1. In-situ FTIR studies of  $\text{CO}_2$  methanation and  $\text{HCOOH}$  hydrogenation on  $\text{Ni/Ce}_{0.5}\text{Zr}_{0.5}\text{O}_2$  at  $375^\circ\text{C}$ .
